1 **The prevalence and associated factors of adverse pregnancy outcomes among**  
2 **Afghan women in Iran; findings from community-based survey**

3

4

5 **Authors:** Omid Dadras<sup>1</sup>, Takeo Nakayam<sup>2</sup>, Masahiro Kihara<sup>3</sup>, Masako Ono-Kihara<sup>4</sup>,  
6 Seyedahmad Seyedalinaghi<sup>5</sup>, Fateme Dadras<sup>6</sup>

7

8 **Affiliations**

9 <sup>1</sup> Department of Health Informatics, Graduate School of Medicine, Kyoto University, Kyoto,  
10 Japan. Email: omiddadras@yahoo.com

11 <sup>2</sup> Department of Health Informatics, Graduate School of Medicine, Kyoto University, Kyoto,  
12 Japan. Email: nakayama.takeo.4a@kyoto-u.ac.jp

13 <sup>3</sup> Department of Health Informatics, Graduate School of Medicine, Kyoto University, Kyoto,  
14 Japan. Email: kihara.masahiro.44z@st.kyoto-u.ac.jp

15 <sup>4</sup> Global Health Interdisciplinary Unit, Center for Promotion of Interdisciplinary Education and  
16 Research, Kyoto University, Kyoto, Japan. Email: kihara.masako.2u@kyoto-u.ac.jp

17 <sup>5</sup> Iranian Research Center for HIV/AIDS, Iranian Institute for Reduction of High-Risk Behaviors,  
18 Tehran University of Medical Sciences, Tehran, Iran. Email: s\_a\_alinaghi@yahoo.com

19 <sup>6</sup> Department of Obstetrics and Gynecology, Tehran University of Medical Science, Tehran, Iran.  
20 Email: fatima.dadras@gmail.com

21 **Corresponding author**

22 Correspondence to Omid Dadras, Department of Health Informatics, Graduate School of  
23 Medicine, Kyoto University, Kyoto, Japan. Email: omiddadras@yahoo.com,  
24 Tel:+989114058914

25

26

27

28 **Abstract**

29 **Backgrounds:** An estimated 2.5 million Afghans are living in the Iran and almost half of them  
30 are young women at the childbearing ages. Although the evidence indicates lower rates of  
31 antenatal care and higher incidence of pregnancy complications in Afghan compared to Iranian  
32 women, the underlying reasons are not well defined. Therefore, in the present study, we aimed to  
33 explore the prevalence and associated sociodemographic factors of adverse pregnancy outcomes  
34 and examine the impact of intimate partner violence, food insecurity, poor mental health, and  
35 housing issues on pregnancy outcome in Afghan women living in Iran.

36 **Methods:** In July 2019, we enrolled 424 Afghan women aged 18-44 years old using the time-  
37 location sampling at three community health centers in the south region of Tehran province. The  
38 data was collected through face to face interviews using the researcher-developed questionnaire.  
39 Using bivariate and multivariate analysis, the impact of poor antenatal care, intimate partner  
40 violence, food insecurity, and poor mental health was assessed on the incidence of adverse  
41 pregnancy outcome.

42 **Results:** More than half (56.6%) of Afghan women reported at least one pregnancy complication  
43 in their recent pregnancy. The results showed that undocumented , illiterate, and unemployed  
44 Afghan women with lower socioeconomic status are more likely to experience adverse  
45 pregnancy outcomes. Furthermore, we observed lower prevalence of adverse pregnancy  
46 outcomes among documented immigrants with health insurance compared to those with no  
47 health insurance. It is also been found that the food insecurity [Adjusted OR = 3.35, 95% CI  
48 (1.34-8.36)], poor antenatal care [Adjusted OR = 10.50, 95% CI (5.40-20.39)], intimate partner  
49 violence [Adjusted OR = 2.72, 95% CI (1.10-6.77)], and poor mental health [Adjusted OR =  
50 4.77, 95% CI (2.54-8.94)] could adversely impact the pregnancy outcome and we observed  
51 higher incidence of adverse outcomes among those suffering from these situations.

52 **Conclusion:** To our knowledge, this is the first study that explored the prevalence and associated  
53 factors of adverse pregnancy outcomes and the impact of intimate partner violence, food  
54 insecurity, poor mental health on pregnancy outcome among Afghan women in Iran. Enhancing  
55 the psychosocial support and empowering Afghan women through expanding the social network  
56 and safety net should be a priority for the central government and international parties.  
57 Psychological counseling should be incorporated into routine maternity care for Afghan refugees.  
58 Access to free antenatal care is a right for all Afghan women and it should be facilitated by  
59 universal health insurance for all Afghans regardless of their legal status.

60

61

62

63

64

65

## 66 **Introduction**

67 Afghans are the second-largest refugee population after Syrians worldwide (1). During the last  
68 decades, Iran has been one of the countries that received a large number of Afghan immigrants  
69 and refugees in the Middle East (2). Afghans account for 96% of registered refugees in Iran,  
70 comprising 3% (approximately 2.5 million) of the total Iran population (3). Less than half of this  
71 population are women; however, the majority of them are young, and at the childbearing ages (4).  
72 Refugees are one of the most vulnerable population in the host country. The feeling of  
73 abandonment and isolation in the host society could endanger their physical and mental health.  
74 They may also experience multiple discriminations, violence, or exploitation which may impair  
75 their mental and physical health (3). In Iran, Afghan population include immigrants and refugees  
76 who either have valid documents or enter the country illegally from east border; therefore,  
77 instead of using refugee or immigrant, we used documented or undocumented immigrants in this  
78 paper.

79 In Iran, Afghan women are commonly subjected to several hostile encounters such as intimate  
80 partner violence, limited access to maternity care, and financial and housing struggles (5, 6).  
81 These issues are more likely to be seen among those of younger age and lower education or  
82 socioeconomic status (7) and could adversely affect the health of mother and offspring in women  
83 of fertile ages during pregnancy (8). A growing body of evidence documented lower access to  
84 maternity care and consequently higher occurrence of adverse pregnancy outcomes among  
85 immigrant and refugee women in different countries (8-10). Financial constraints, inadequate  
86 health literacy, costly care, and lack of health insurance are some of the obstacles in receiving  
87 effective and adequate maternity care among Afghan women in Iran (6, 8, 11). Despite the  
88 abundance of evidence indicating the low access of Afghan women to maternity care in Iran, the  
89 impact of such low access on the pregnancy outcome is still unclear.

90 Several notable factors have been associated with poor reproductive health outcomes among  
91 Afghan women in Iran. Intimate partner violence (IPV) has been linked to poor reproductive  
92 health outcomes such as unwanted pregnancy and lower uptake of modern contraceptive  
93 methods among Afghan women; however, the possible impact on pregnancy outcome was not  
94 characterized in previous studies (5). A study in Iran indicated high prevalence of IPV among  
95 Afghans (79.8%). It is almost five times higher than the reported number in Iranian women  
96 (14.1%) (12). Food insecurity is also a very important determinant of health outcomes in an  
97 expectant mother (13, 14). Moderate to severe food insecurity has been documented in  
98 approximately 60% of Afghan households in Iran (15), this could lead to adverse pregnancy  
99 outcomes in Afghan women suffering from lack of adequate nutrients and vitamins and may  
100 harm the health of the new borne (13). The poorer mental health has also been linked to the  
101 higher incidence of adverse pregnancy outcomes such as low birth weight or preterm birth in  
102 several studies (16, 17); however, the evidence is missing in specific ethnic groups such as  
103 Afghans. It is important to define the impact of IPV, food insecurity, and poor mental health on  
104 pregnancy outcome, especially among vulnerable populations such as Afghan refugee women, to  
105 prevent adverse pregnancy outcomes.

106 Although the current evidence indicates a higher prevalence of adverse pregnancy outcomes  
107 among Afghan women compared to Iranian women (6, 8), there is a gap in knowledge regarding  
108 the determinants and associated factors of such outcomes among Afghan women living in Iran.  
109 Therefore, in the present study, we explored the associated sociodemographic factors and the  
110 potential impact of intimate partner violence, poor mental health, food insecurity, and housing  
111 issues on pregnancy outcomes among Afghan women in Iran.

## 112 **Methods**

### 113 *Study setting*

114 We carried out a cross-sectional study among Afghan women living in Iran from June 2019 to  
115 August 2019. The study setting was decided by consensus between experts at Tehran University  
116 of Medical Sciences and Iran Ministry of Health. The south region of Tehran where the highest  
117 number of Afghan nationals are currently living was selected as the study setting. This region,  
118 so-called Share-Rey is located in the south-east part of Tehran province. There are 15 urban  
119 community health centers in this region in which primary health care including antenatal care is  
120 provided.

### 121 *Sample size*

122 Based on the literature review (16), with the conservative assumption of dependent variable  
123 prevalence not to be less than 50%, the confidence level of 95%, a relative precision of 5%  
124 points on each side, and a response rate of 90%, the sample size was calculated 424. The  
125 response rate was 100% and we had no dropout or withdrawal during the study.

### 126 *Sampling method*

127 Afghan population, particularly the undocumented ones, are really hard to reach in Iran.  
128 Therefore, applying the time-location sampling (TLS) method. TLS is a method for sampling the  
129 hard-to-reach population in places and at times where they congregate rather than where they  
130 live (17). Following the TLS sampling procedure, in the beginning, the common places and  
131 times that Afghan females visit to receive maternity care were identified. Through a primary  
132 field investigation, we realized that the urban community health centers are the most popular  
133 places for Afghan women to visit for maternity care and morning time is the usual time of visit.  
134 Therefore, we identified all the community health centers in Shahre-Rey (15 centers) and  
135 selected three centers with the highest number of Afghan visitors. We visited these centers in the  
136 morning time during the working days of four consecutive weeks in July 2019. A sample of 424  
137 Afghan women, who met the eligibility criteria and consent to participate, were recruited  
138 proportionately to the size of the Afghan population visiting the corresponding community health  
139 center.

### 140 *Inclusion and exclusion criteria*

141 The eligibility criteria were being an Afghan national, aged 18-49 years, given birth or being  
142 pregnant during the year before the interview, and lived in Iran at least a year and during the time  
143 of pregnancy. We excluded those with physical disabilities that affect their access to maternity

144 care, those who visited or stayed in Afghanistan during their pregnancy, those who suffer from  
145 infertility, and those who did not consent to participate.

#### 146 *Instrument and variables*

147 The questionnaire (supplementary 1) of the present study was developed based on a  
148 comprehensive literature review and consulting the experts at Kyoto University and Tehran  
149 University of Medical Sciences. The questionnaire collected the data on participants'  
150 sociodemographic characteristics including the age, education, employment, family income  
151 (<4million vs  $\geq$ 4million-Iranian Toman), legal status (documented vs undocumented), length of  
152 stay (<5 years vs  $\geq$ 5 years), parity, husband employment, and education. It also contained  
153 questions asking about the intimate partner violence (ever been physically, emotionally, or  
154 sexually abused during the recent pregnancy) poor mental health (feeling down, depressed, or  
155 hopeless), housing issues (housing issues such as unaffordability, lack of appropriate furniture,  
156 home insecurity in last year), food insecurity (missing a meal, while hungry, due to not enough  
157 food/no money to buy during last month), and the number of antenatal care (ANC) visits. The  
158 optimal number of ANC was  $\geq$  8 visits during pregnancy based on the WHO recommendation  
159 (2016) (18). The adverse pregnancy outcomes included preterm labor, abortion, stillbirth,  
160 eclampsia/pre-eclampsia, early rupture of membrane, gestational hypertension, gestational  
161 diabetes, intrapartum Hemorrhage, infections, or any of the above-complications.

#### 162 *Data collection*

163 A pilot study, including 12 participants was performed before the main study to assess the  
164 questionnaire comprehensibility and appropriateness and to ensure that the questions were well  
165 defined, clearly understood, and presented consistently. The interview session took place at a  
166 separate room in the community health center where only the interviewer and interviewee were  
167 present. The interviewers were three Afghan graduate midwifery female students at Tehran  
168 University of Medical Sciences. The participants were approached by the interviewers during the  
169 visit to the community health center. A brief introduction to the study and its objectives was  
170 provided for each participant before the interview. Given verbal consent, the woman was entered  
171 the study and written consent was obtained before the interview. Data were collected in the  
172 questionnaire through face-to-face interview in a separate room at the community health center  
173 in which only the interviewer and the participants were present. Interviews were conducted in the  
174 Persian language and each lasted approximately 15 minutes. At the end of the interview, the  
175 women's concern regarding the adverse pregnancy outcomes and how to prevent them were  
176 addressed by the interviewers.

#### 177 *Data analysis*

178 The distribution of sociodemographic characteristics and the prevalence of adverse pregnancy  
179 outcomes, poor ANC, intimate partner violence, poor mental health, housing issues, and food  
180 insecurity were reported using descriptive statistics (Table 1 and 2). The association between  
181 sociodemographic factors, poor ANC, intimate partner violence, poor mental health, housing  
182 issues, and food insecurity with adverse pregnancy outcomes were assessed using the chi-square  
183 test and reporting the crude odds ratios (Tables 3 and 4). Subsequently, the adjusted odds ratios

184 were calculated using logistic models to account for the potential confounding effects of  
185 sociodemographic factors (Tables 3 and 4). The STATA software version 14 was used for data  
186 analysis. P-value less than 0.05 was determined as the significant statistical level.

### 187 *Ethics approval and consent to participate*

188 The protocol of the present study was reviewed and approved by the Institutional Review Board  
189 (IRB) of both Graduate School of Medicine, Kyoto University (Ethic code: R1836), and Tehran  
190 University of Medical Science (Ethic code: 1397.945). The objectives of the study, potential  
191 harms, and benefits were explained for all participants and informed written consent was  
192 obtained thereafter.

**Table 1.** The distribution of the participant's characteristics (n=424)

|                                 |                                                                                   | n (%)      |
|---------------------------------|-----------------------------------------------------------------------------------|------------|
| Age group (year)                | 18-24                                                                             | 131 (30.9) |
|                                 | 25-34                                                                             | 188 (44.3) |
|                                 | 35-44                                                                             | 105 (24.8) |
| Education                       | Illiterate                                                                        | 160 (37.7) |
|                                 | Literate                                                                          | 264 (62.3) |
| Employment                      | Employed                                                                          | 216 (50.9) |
|                                 | Unemployed                                                                        | 208 (49.1) |
| Parity                          | 1                                                                                 | 80 (18.9)  |
|                                 | 2-4                                                                               | 240 (56.6) |
|                                 | ≥ 5                                                                               | 104 (24.5) |
| Husband education               | Illiterate                                                                        | 159 (37.5) |
|                                 | Literate                                                                          | 265 (62.5) |
| Husband employment              | Employed                                                                          | 416 (98.1) |
|                                 | Unemployed                                                                        | 8 (1.9)    |
| Family income (Iranian Toman)   | < 4 million                                                                       | 224 (52.8) |
|                                 | ≥ 4 million                                                                       | 200 (47.2) |
| Length of stay in Iran          | < 5 years                                                                         | 192 (45.3) |
|                                 | ≥ 5 year                                                                          | 232 (54.7) |
| Legal status                    | Undocumented                                                                      | 160 (37.7) |
|                                 | Documented                                                                        | 264 (62.3) |
| Insurance *                     | No insurance                                                                      | 144 (54.5) |
|                                 | Has insurance                                                                     | 120 (45.5) |
| Poor ANC                        | Less than 8 antenatal visits                                                      | 272 (64.2) |
| Intimate partner violence (IPV) | Ever been physically, emotionally, or sexually abused during the recent pregnancy | 65 (15.3)  |
| Poor mental health              | Feeling down, depressed, or hopeless within last year                             | 264 (62.3) |
| Housing issues                  | Housing issues in last year                                                       | 88(20.8)   |

193 **Results**

194 Table 1 indicates the  
 195 sociodemographic characteristics  
 196 of Afghan women in the present  
 197 study. A total of 424 women aged  
 198 18-44 years old enrolled in this  
 199 study. All the participants who consent to attend the interview completed the study. Almost a  
 200 third (37.7%) of them were illiterate and half of them were employed. The majority had between  
 201 2 to 4 pregnancy experiences. The household income was less than 4 million (Iranian Toman) in  
 202 approximately half of the women (52.8%). Almost two-thirds (62.3%) of the women were  
 203 documented immigrants. Amongst documented immigrants, less than half (45.5%) had health  
 204 insurance. Approximately two-thirds (64.2%) of women reported having equal or more than 8  
 205 ANC visits during their recent pregnancy. Sixty-five women (15.3%) reported being physically,  
 206 emotionally, or sexually abused during their recent pregnancy. More than 60% of Afghan  
 207 women reported depression symptoms such as feeling down or hopeless during last year.  
 208 Housing issues were reported by 88 (20.8%) women within last year. Food insecurity was  
 209 documented among 61 (14.4%) of Afghan women enrolled in this study.

|                 |                                                                                        |           |
|-----------------|----------------------------------------------------------------------------------------|-----------|
| Food insecurity | Missing a meal, while hungry, due to not enough food/no money to buy during last month | 61 (14.4) |
| Total           |                                                                                        | 424 (100) |

\* Only included the documented immigrant (n = 264)

210 *Prevalence of pregnancy complications*

211 The most prevalent obstetrics complication was preterm labor observed in 88 (20.8%) of women  
 212 in this study. Gestational hypertension (15.1%), gestational diabetes (13.2), intrapartum  
 213 hemorrhage (12.7%), early rupture of membrane (11.3%), stillbirth (7.5%), and abortion (5.7%)  
 214 were the other reported obstetric  
 215 complications. Gynecologic infection was  
 216 reported by 168

217 (39.6%) of women. Overall, 250 (56.6%) of  
 218 participants reported at least one pregnancy  
 219 complication during their recent pregnancy.

220 *The association of sociodemographic factors  
 221 with adverse pregnancy outcomes*

222 Although in bivariate analysis, the higher age  
 223 was associated with more pregnancy  
 224 complications; adjusting for other variables,  
 225 diluted this association (Table 3). The  
 226 illiterate and unemployed women were more  
 227 likely to experience adverse pregnancy  
 228 outcomes (AOR = 3.81; 95% CI [1.74-8.36]  
 229 and AOR = 2.43; 95% CI [1.20-4.92], respectively). The women with higher parity were more  
 230 likely to experience adverse

**Table 2.** The prevalence of the adverse outcome in the recent pregnancy in the study population (n=424)

|                            | n (%)      |
|----------------------------|------------|
| Preterm Labor              | 88 (20.8)  |
| Abortion                   | 24 (5.7)   |
| Stillbirth                 | 32 (7.5)   |
| Eclampsia/pre-eclampsia    | 16 (3.8)   |
| Early rupture of membrane  | 48 (11.3)  |
| Gestational hypertension   | 64 (15.1)  |
| Gestational diabetes       | 56 (13.2)  |
| Intrapartum Hemorrhage     | 54 (12.7)  |
| Infections                 | 168 (39.6) |
| Any of above-complications | 250 (56.6) |

**Table 3.** The association of sociodemographic characteristics with adverse pregnancy outcome among Afghan women (n=424)

|                               |               | <i>OR</i>          | <i>AOR</i> <sup>2</sup> |
|-------------------------------|---------------|--------------------|-------------------------|
| Age group (year)              | 18-24         | Ref                | Ref                     |
|                               | 25-34         | 1.78 (1.13-2.80)   | 0.78 (0.38-1.61)        |
|                               | 35-44         | 8.73 (4.6-16.51)   | 1.19 (0.44-3.18)        |
| Education                     | Literate      | Ref                | Ref                     |
|                               | Illiterate    | 8.72 (5.29-14.36)  | 3.81 (1.74-8.36)        |
| Employment                    | Employed      | Ref                | Ref                     |
|                               | Unemployed    | 2.81 (1.89-4.19)   | 2.43 (1.20-4.92)        |
| Parity                        | 1             | Ref                | Ref                     |
|                               | 2-4           | 2.67 (1.55-4.58)   | 2.48 (1.10-5.56)        |
|                               | ≥ 5           | 12.83 (6.27-26.26) | 8.22 (2.30-29.36)       |
| Husband education             | Illiterate    | 7.11 (4.39-11.50)  | 1.36 (0.73-2.54)        |
|                               | Literate      | Ref                | Ref                     |
| Family income (Iranian Toman) | < 4 million   | 5.33 (3.51-8.10)   | 4.23 (2.22-8.07)        |
|                               | ≥ 4 million   | Ref                | Ref                     |
| Length of stay                | < 5 years     | 1.56 (1.05-2.30)   | 1.62 (0.91-2.90)        |
|                               | ≥ 5 year      | Ref                | Ref                     |
| Legal status                  | Undocumented  | 3.60 (2.34-5.55)   | 4.28 (2.13-8.57)        |
|                               | Documented    | Ref                | Ref                     |
| Insurance <sup>1</sup>        | No insurance  | 8.00 (4.54-14.09)  | 21.02 (5.78-77.74)      |
|                               | Has insurance | Ref                | Ref                     |

<sup>1</sup> Only included the documented immigrant (n = 264)

<sup>2</sup> AOR (adjusted odds ratio): Adjusted for other sociodemographic factors including: age, education, employment, parity, husband education, family income, length of stay, legal status.

231 pregnancy outcome (Table 3). Husband illiteracy was associated with higher risk of adverse  
 232 outcomes (OR = 7.11; 95% CI [4.39-11.5]); however, this association melted after adjustment  
 233 for other sociodemographic factors (AOR = 1.36; 95% CI [0.73-2.54]). Household income  
 234 appeared to be lower than 4 million/month in women who experienced any adverse pregnancy  
 235 outcomes (AOR = 4.23; 95% CI [2.22-8.07]). Recent Afghan immigrants (equal or less than 5  
 236 years) reported higher pregnancy complications compared to settled ones (more than 5 years),  
 237 although this association was not significant after multivariable adjustment (AOR = 1.62; 95%  
 238 CI [0.91-2.90]). The undocumented immigrants were more likely to experience adverse  
 239 pregnancy, even after adjustment for other variables (AOR = 4.28; 95% CI [2.13-8.57]). Among  
 240 documented immigrants, those with no health insurance had higher risk of any adverse  
 241 pregnancy outcomes, this association almost doubled after adjustment for other  
 242 sociodemographic variables (OR = 8.00; 95% CI [4.54-14.09] versus AOR = 21.02; 95% CI  
 243 [5.78-77.74]).



**Table 4.** The impact of domestic violence, poor mental health, housing issues, and food security on pregnancy complications (n=424)

|                             | Poor ANC           | IPV               | Poor mental health | Housing issues     | Food security     |
|-----------------------------|--------------------|-------------------|--------------------|--------------------|-------------------|
| Any pregnancy complications |                    |                   |                    |                    |                   |
| OR (95% CI)                 | 12.19 (7.54-19.69) | 6.85 (3.18-14.76) | 9.36 (5.95-14.78)  | 11.00 (5.16-23.47) | 6.24 (2.88-13.49) |
| Adjusted OR*                | 10.50 (5.40-20.39) | 2.72 (1.10-6.77)  | 4.77 (2.54-8.94)   | 1.45 (0.48-4.42)   | 3.35 (1.34-8.36)  |

\* Adjusted for possible confounding factors including household income, legal status, mother's age, education, and employment, husband's education

244 *The impact of IPV, poor mental health, housing issues, and food security on pregnancy outcome*

245 As Table 4 indicates, the Afghan women who experienced IPV (physically, emotionally, and  
246 sexually) were more likely to experience adverse pregnancy outcomes in both bivariate and  
247 multivariate analysis (AOR = 2.72; 95% CI [1.10-6.77]). Poor mental health appeared to be  
248 associated with higher occurrence of pregnancy complications in Afghan women enrolled in this  
249 study (AOR = 4.77; 95% CI [2.54-8.94]). Although housing issues were more reported in  
250 women with higher adverse outcomes (AOR = 11.00; 95% CI [5.16-23.47]), this association  
251 melted after adjustment for sociodemographic factors (AOR = 1.45; 95% CI [0.48-4.42]). The  
252 unavailability of appropriate amounts of food for households appeared to be a significant factor  
253 influencing the occurrence of adverse pregnancy outcomes in Afghan women (AOR = 3.35; 95%  
254 CI [1.34-8.36]).

255 *The association between poor ANC and adverse pregnancy outcome*

256 The inadequate ANC (<8 visits) was significantly associated with adverse pregnancy outcomes  
257 in both bivariate and multivariate analyses (OR = 12.19; 95% CI [7.54-19.69], AOR = 10.50;  
258 95% CI [5.40-20.39]).

259 **Discussion**

260 Afghan refugee women are a very vulnerable population in Iran whose health needs have been  
261 neglected for decades. A number of reasons have been cited as the obstacles toward adequate  
262 health care among them such as financial struggles, health illiteracy, gender inequality, gender-  
263 based violence, and lack of autonomy (6, 8, 11). The limited access to health care contributes to  
264 the higher incidence of adverse health outcomes, particularly during pregnancy, and could  
265 jeopardize the health of the mother and new borne (18). In the present study, we estimated the  
266 prevalence of adverse pregnancy outcomes and explored the associated sociodemographic  
267 factors as well as the impact of poor ANC, poor mental health, IPV, food insecurity, and housing  
268 issues on pregnancy outcome in Afghan women living in Iran. More than half of the participants  
269 in the present study reported at least one adverse pregnancy outcome in their recent pregnancy.  
270 The prevalence of adverse pregnancy outcomes appeared to be higher in Afghan compared to  
271 Iranian women (almost two times higher for preterm labor, pre-eclampsia, gestational  
272 hypertension, and diabetes) (19-21). The results showed that undocumented, illiterate, and  
273 unemployed Afghan women with low socioeconomic status are more likely to experience  
274 adverse pregnancy outcomes. Furthermore, we observed lower prevalence of adverse pregnancy

275 outcomes among documented immigrants with health insurance. It is also been found that food  
276 insecurity, poor ANC, IPV, and poor mental health could adversely impact the pregnancy  
277 outcome and we observed higher incidence of adverse outcomes among those suffering from  
278 these situations.

279 For many years, Iran has been a popular destination for a large number of Afghan refugees. The  
280 documents from UNHCR indicate that documented Afghan migrants have free access to primary  
281 health care similar to Iranian citizens (22) and benefit the free public health relevant programs  
282 such as vaccination and family-planning services. However, there are serious shortcomings in  
283 health provision for Afghan women such as lack of access to free ANC on contrary to Iranian  
284 women (23). Several studies, similar to our study, linked the inadequate ANC to adverse  
285 pregnancy outcomes. The lower socioeconomic, inadequate health literacy, and undocumented  
286 status could contribute to lower access to ANC and subsequently higher incidence of adverse  
287 pregnancy outcomes in immigrant and refugee women (24, 25).

288 Since 2016, all registered Afghan migrants could benefit the Universal Public Health Insurance  
289 in Iran. This substantially increased their access to the health system ever since (3); however,  
290 some vital ANC services such as prenatal screening tests or ultrasound are not covered and  
291 reimbursed by this insurance. This could reduce Afghan women's access to adequate maternity  
292 care and increase the incidence of adverse pregnancy outcomes (6). Likewise, we found lower  
293 pregnancy complications among those documented migrants owning public health insurance,  
294 even after adjustment for other sociodemographic variables. On the other hand, the situation for  
295 undocumented migrants is unclear, we believe that the lower socioeconomic status and literacy  
296 along with lack of health insurance could considerably reduce the access of unregistered Afghan  
297 women to the health system and adequate antenatal care and lead to adverse pregnancy outcomes.  
298 Therefore, we advise the central government and international parties to provide affordable  
299 universal health coverage for all Afghan nationals, at least for Afghan women, regardless of their  
300 documented status to ensure the health of Afghan mothers and their offspring.

301 Food insecurity was associated with higher adverse pregnancy outcomes in the present study. A  
302 similar observation was documented among African immigrants in developed countries (26) and  
303 Latino immigrants in the USA (27). High prevalence of food insecurity (61%) has been observed  
304 in Afghan households in a study conducted in Tehran and Mashhad by Omidvar et al (15).  
305 Another study reported an even higher rate of food insecurity among the Afghan households in  
306 Pakdasht (88%) (28); however, in our study, the prevalence of food insecurity was much lower  
307 (14.4%). This could be due to the difference in study setting and measurement. Several factors  
308 contribute to the food insecurity in Afghan households such as low levels of literacy, illegal  
309 residential status, unemployment, housing issues, and low socioeconomic status (15). The lack of  
310 adequate calories, minerals, and vitamins in pregnant women could result in lower birth weight,  
311 preterm birth, premature rupture of membrane, and higher rate of infections (29). This calls for  
312 interventions and initiatives to improve food security in Afghan households and to provide  
313 adequate mineral and vitamin supplements for pregnant mothers.

314 Intimate partner violence is an inevitable widespread phenomenon among the refugee population  
315 (30). IPV was reported by almost 15% of Afghan women enrolled in our study. A similar rate

316 was reported for Iranian women living in Mazandaran province in Iran (12). Low literacy and  
317 socioeconomic factors contribute to the higher IPV incidence against women (5, 12). We also  
318 found a significant association between IPV and adverse pregnancy outcomes. Although the  
319 knowledge regarding the IPV and associated factors among Afghan women living in Iran is  
320 limited, the existent literature indicates higher prevalence of IPV in Afghan compared to Iranian  
321 women (5). A study in Semnan province documented poor reproductive health in Afghan women  
322 suffering from IPV(5); however, our study is the first study that reports on the negative impact of  
323 IPV on adverse pregnancy outcomes in Afghan women living in Iran. The results emphasize the  
324 necessity of expanding the safety net to enhance the psychosocial support for Afghan women in  
325 Iran.

326 Poor mental health and psychosocial stress are independent risk factors of adverse pregnancy  
327 outcomes (16); however, the impact could be modified by culture, ethnic, and religious practices  
328 (31, 32). In our study, there was a significant association between poor mental health and adverse  
329 pregnancy outcomes. The feeling of discrimination, abandonment, and isolation along with  
330 employment and financial issues cause enormous psychosocial distress and could impair the  
331 physical and mental integrity and lead to mental illnesses such as anxiety and depression (33).  
332 Besides, the studies have shown increased vulnerability in female refugees and immigrants,  
333 particularly those at the young ages (34, 35). The negative impact of poor mental health could  
334 more evident in pregnant women who may already be overwhelmed with the psychological  
335 burden of maternity care (17). This highlights the importance of psychological counseling in  
336 maternity care.

### 337 **Limitation**

338 Although this is the first study that reports the prevalence, associated factors, and the impact of  
339 food insecurity, poor mental health, and intimate partner violence on pregnancy outcomes in  
340 Afghan women living in Iran, there were some shortcomings should be considered in interpreting  
341 the results and implementing future studies. First, since the main objectives of this survey were  
342 to explore the barriers toward adequate ANC in Afghan women living in Iran (6, 8), we were not  
343 able to use standard questionnaires to collect the data on intimate partner violence, poor mental  
344 health, housing issues, and food security due to limited resources and time; instead, we included  
345 some key short questions asking about intimate partner violence “have you ever been physically,  
346 emotionally, or sexually abused during the recent pregnancy?”, poor mental health “feeling down,  
347 depressed, or hopeless within last year”, housing issues “housing issues in the last year”, and  
348 food insecurity “missing a meal, while hungry, due to not enough food/no money to buy during  
349 last month” to account for such shortcomings. Second, we sampled the women who visit the  
350 community health centers to receive ANC in an urban setting and the results cannot be  
351 extrapolated to the suburb and rural Afghan population. This could also be one of the reasons for  
352 lower rates of some indicators such as IPV or food insecurity in our study. Future studies should  
353 account for such discrepancies in sociodemographic factors between urban and rural populations.

### 354 **Conclusion**

355 To our knowledge, this is the first study that explored the prevalence and associated factors of  
356 adverse pregnancy outcomes and the impact of intimate partner violence, food insecurity, poor  
357 mental health on pregnancy outcomes among Afghan women in Iran. The results showed higher  
358 prevalence of adverse pregnancy outcomes in Afghan compared to Iranian women. The low  
359 literacy and socioeconomic status, unemployment, illegal status, and lack of health insurance  
360 were some of the important indicators of adverse pregnancy outcomes in Afghan women. Food  
361 insecurity, poor mental health, IPV, and poor ANC were significantly associated with higher  
362 incidence of pregnancy complications in Afghan women. Enhancing the psychosocial support  
363 and empowering Afghan women through expanding the social network and safety net should be  
364 a priority for the central government and international parties. Psychological counseling should  
365 be incorporated into routine maternity care for Afghan refugees. Access to free antenatal care is a  
366 right for all Afghan women and it should be facilitated by universal health insurance for all  
367 Afghans regardless of their legal status.

### 368 **Availability of data and material**

369 Data could be available upon a reasonable request and with the permission of Tehran University  
370 of Medical Science ethical committee.

### 371 **Competing interests**

372 The authors declare no conflict of interests.

### 373 **Funding**

374 There was no source of funding for the present study.

### 375 **Authors' contributions**

376 OD, TN, MK, and MOK contributed to the study conception and design, Data analysis and  
377 interpretation, and Critical revision of the article. OD, FD, SS, and conducted the interviews and  
378 collect the data. OD, TN, MK, and FD wrote and revised the first draft. All authors read and  
379 approved the final manuscript.

### 380 **Acknowledgment**

381 We would like to thank our distinguished colleagues at Tehran University of Medical Science,  
382 whose precious efforts helped us to a great extent in implementing this study.

### 383 **References**

- 384 1. UNHCR. Islamic Republic of Iran, Solutions Strategy for Afghan Refugees UNHCR. 2014a.
- 385 2. Abbasi-Shavazi M. Return to Afghanistan? A study of Afghans living in Mashhad, Islamic Republic  
386 of Iran. Afghanistan Research and Evaluation Unit; 2005.
- 387 3. Hosseini Divkolaye NS, Burkle FM, Jr. The Enduring Health Challenges of Afghan Immigrants and  
388 Refugees in Iran: A Systematic Review. PLoS Curr.  
389 2017;9:ecurrents.dis.449b4c549951e359363a90a7f4cf8fc4.
- 390 4. IOM. International Migration Report. United Nations; 2018.

- 391 5. Delkhosh M, Merghati Khoei E, Ardalan A, Rahimi Foroushani A, Gharavi MB. Prevalence of  
392 intimate partner violence and reproductive health outcomes among Afghan refugee women in Iran.  
393 *Health Care for Women International*. 2019;40(2):213-37.
- 394 6. Dadras O, Taghizade Z, Dadras F, Alizade L, Seyedalinaghi S, Ono-Kihara M, et al. "It is good, but I  
395 can't afford it ..." potential barriers to adequate prenatal care among Afghan women in Iran: a  
396 qualitative study in South Tehran. *BMC Pregnancy and Childbirth*. 2020;20(1):274.
- 397 7. Otoukesh S, Mojtahedzadeh M, Sherzai D, Behazin A, Bazargan-Hejazi S, Bazargan M. A  
398 retrospective study of demographic parameters and major health referrals among Afghan refugees in  
399 Iran. *Int J Equity Health*. 2012;11:82.
- 400 8. Dadras O, Dadras F, Taghizade Z, Seyedalinaghi S, Ono-Kihara M, Kihara M, et al. Barriers and  
401 associated factors for adequate antenatal care among Afghan women in Iran; findings from a  
402 community-based survey. *BMC Pregnancy and Childbirth*. 2020;20(1):427.
- 403 9. Small R, Yelland J, Lumley J, Brown S, Liamputtong P. Immigrant Women's Views About Care  
404 During Labor and Birth: An Australian Study of Vietnamese, Turkish, and Filipino Women. *Birth*.  
405 2002;29(4):266-77.
- 406 10. Higginbottom GMA, Morgan M, Alexandre M, Chiu Y, Forgeron J, Kocay D, et al. Immigrant  
407 women's experiences of maternity-care services in Canada: a systematic review using a narrative  
408 synthesis. *Systematic Reviews*. 2015;4(1):13.
- 409 11. Mohammadi S, Carlbom A, Taheripanah R, Essén B. Experiences of inequitable care among  
410 Afghan mothers surviving near-miss morbidity in Tehran, Iran: a qualitative interview study.  
411 *International Journal for Equity in Health*. 2017;16(1):121.
- 412 12. Abdollahi F, Abhari FR, Delavar MA, Charati JY. Physical violence against pregnant women by an  
413 intimate partner, and adverse pregnancy outcomes in Mazandaran Province, Iran. *J Family Community  
414 Med*. 2015;22(1):13-8.
- 415 13. Ivers LC, Cullen KA. Food insecurity: special considerations for women. *The American Journal of  
416 Clinical Nutrition*. 2011;94(6):1740S-4S.
- 417 14. Food Insecurity And Health Outcomes. *Health Affairs*. 2015;34(11):1830-9.
- 418 15. Omidvar N, Ghazi-Tabatabaie M, Sadeghi R, Mohammadi F, Abbasi-Shavazi MJ. Food insecurity  
419 and its sociodemographic correlates among Afghan immigrants in Iran. *J Health Popul Nutr*.  
420 2013;31(3):356-66.
- 421 16. Hobel C, Culhane J. Role of Psychosocial and Nutritional Stress on Poor Pregnancy Outcome. *The  
422 Journal of Nutrition*. 2003;133(5):1709S-17S.
- 423 17. Witt WP, Wisk LE, Cheng ER, Hampton JM, Hagen EW. Preconception Mental Health Predicts  
424 Pregnancy Complications and Adverse Birth Outcomes: A National Population-Based Study. *Maternal  
425 and Child Health Journal*. 2012;16(7):1525-41.
- 426 18. Laditka SB, Laditka JN, Mastanduno MP, Lauria MR, Foster TC. Potentially avoidable maternity  
427 complications: an indicator of access to prenatal and primary care during pregnancy. *Women Health*.  
428 2005;41(3):1-26.
- 429 19. Tavakolipour S, Beigi M, Nekuei N, Shafiei F. The Prevalence of Pregnancy Hypertensive  
430 Disorders and Their Related Factors in the Second and Third Level Hospitals Affiliated to Isfahan  
431 University of Medical Sciences, Isfahan, Iran. *Journal of Midwifery and Reproductive Health*.  
432 2019;7(3):1726-31.
- 433 20. Kharaghani R, Cheraghi Z, Okhovat Esfahani B, Mohammadian Z, Nooreldinc RS. Prevalence of  
434 Preeclampsia and Eclampsia in Iran. *Arch Iran Med*. 2016;19(1):64-71.
- 435 21. Sharifi N, Khazaeian S, Pakzad R, Fathnezhad Kazemi A, Chehreh H. Investigating the Prevalence  
436 of Preterm Birth in Iranian Population: A Systematic Review and Meta-Analysis. *J Caring Sci*.  
437 2017;6(4):371-80.

- 438 22. IUNHCR. UNHCR Global Appeal 2011 Update: United Nations High Commissioner for Refugees  
439 (UNHCR); 2011b [Available from: <http://www.unhcr.org/4cd96d099.html>.  
440 23. Tober DM, Taghdisi MH, Jalali M. "Fewer children, better life" or "as many as God wants"?  
441 Family planning among low-income Iranian and Afghan refugee families in Isfahan, Iran. *Med Anthropol*  
442 *Q.* 2006;20(1):50-71.  
443 24. Reed MM, Westfall JM, Bublitz C, Battaglia C, Fickenscher A. Birth outcomes in Colorado's  
444 undocumented immigrant population. *BMC Public Health.* 2005;5(1):100.  
445 25. Korinek K, Smith KR. Prenatal care among immigrant and racial-ethnic minority women in a new  
446 immigrant destination: Exploring the impact of immigrant legal status. *Social Science & Medicine.*  
447 2011;72(10):1695-703.  
448 26. Lindsay KL, Gibney ER, McAuliffe FM. Maternal nutrition among women from Sub-Saharan Africa,  
449 with a focus on Nigeria, and potential implications for pregnancy outcomes among immigrant  
450 populations in developed countries. *Journal of Human Nutrition and Dietetics.* 2012;25(6):534-46.  
451 27. Sano Y, Garasky S, Greder KA, Cook CC, Browder DE. Understanding Food Insecurity Among  
452 Latino Immigrant Families in Rural America. *Journal of Family and Economic Issues.* 2011;32(1):111-23.  
453 28. Abdollahi M, Abdollahi Z, Sheikholeslam R, Kalantari N, Kavehi Z, Neyestani TR. High occurrence  
454 of food insecurity among urban Afghan refugees in Pakdasht, Iran 2008: a cross-sectional study. *Ecol*  
455 *Food Nutr.* 2015;54(3):187-99.  
456 29. Laraia BA, Siega-Riz AM, Gundersen C. Household Food Insecurity Is Associated with Self-  
457 Reported Pregravid Weight Status, Gestational Weight Gain, and Pregnancy Complications. *Journal of*  
458 *the American Dietetic Association.* 2010;110(5):692-701.  
459 30. Garcia-Moreno C, Jansen HA, Ellsberg M, Heise L, Watts CH. Prevalence of intimate partner  
460 violence: findings from the WHO multi-country study on women's health and domestic violence. *Lancet.*  
461 2006;368(9543):1260-9.  
462 31. THOMAS PE, BECKMANN M, GIBBONS K. The effect of cultural and linguistic diversity on  
463 pregnancy outcome. *Australian and New Zealand Journal of Obstetrics and Gynaecology.*  
464 2010;50(5):419-22.  
465 32. Hollander A-C, Bruce D, Burström B, Ekblad S. The Association Between Immigrant Subgroup and  
466 Poor Mental Health: A Population-Based Register Study. *The Journal of Nervous and Mental Disease.*  
467 2013;201(8).  
468 33. Beiser M, Hou F. Mental Health Effects of Premigration Trauma and Postmigration  
469 Discrimination on Refugee Youth in Canada. *The Journal of Nervous and Mental Disease.* 2016;204(6).  
470 34. Pernice R, Brook J. Refugees' and Immigrants' Mental Health: Association of Demographic and  
471 Post-Immigration Factors. *The Journal of Social Psychology.* 1996;136(4):511-9.  
472 35. Ellis B, MacDonald H, Klunk - Gillis J, Lincoln A, Strunin L, Cabral H. Discrimination and mental  
473 health among Somali refugee adolescents: The role of acculturation and gender. *American Journal of*  
474 *Orthopsychiatry.* 2010;84 (4):564-75.
